# Supplementary material for: Bioreducible dextran–polyethylenimine conjugates regulate transgene expression distribution in vivo
Source: Royal Society of Chemistry journal article supplement (doi:10.1039/c4tb01927j), 2015-01-01
Supplement: c4tb01927j1.pdf [file c4tb01927j1.pdf]

Supporting information

# Bioreducible Dextran-Polyethylenimine Conjugates Regulate Transgene Expression Distribution In Vivo

Jian Zhao<sup>1\*</sup>, Chunxiao Wang<sup>1,2</sup>, Peng Zhao<sup>2</sup>, Xuejun Wen<sup>2</sup>, and Chao Lin<sup>2\*</sup>

<sup>1</sup>Key Laboratory of Rubber-Plastics Ministry of Education and Shandong Provincial  
Key Laboratory of Rubber-Plastics, Qingdao University of Science & Technology,  
Qingdao, 266042, People's Republic of China

<sup>2</sup>Shanghai East Hospital, The Institute for Biomedical Engineering and Nanoscience,  
Tongji University School of Medicine, Tongji University, Shanghai, 200092, People's  
Republic of China.

Fax: 0086 21 65983706-0; Tel: 0086 21 65988029.

\* Corresponding authors.

E-mail: chaolin@tongji.edu.cn (CL),

zp@tongji.edu.cn (ZP),

and zhaojian@gmail.com(JZ)

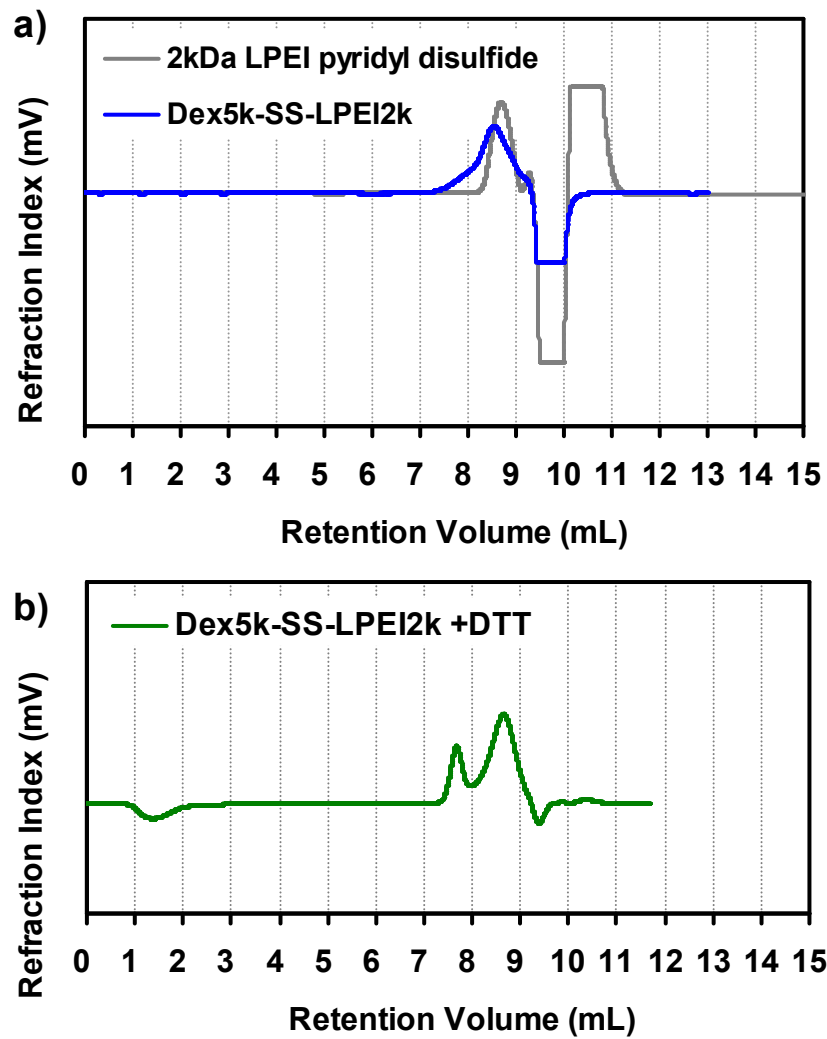

Figure S1. a) GPC profile of Dex5k-SS-LPEI2k and 2kDa LPEI disulfide pyridine; b) GPC profile of Dex5k-SS-LPEI2k in the presence of 2.5 mM dithiothreitol (DTT)

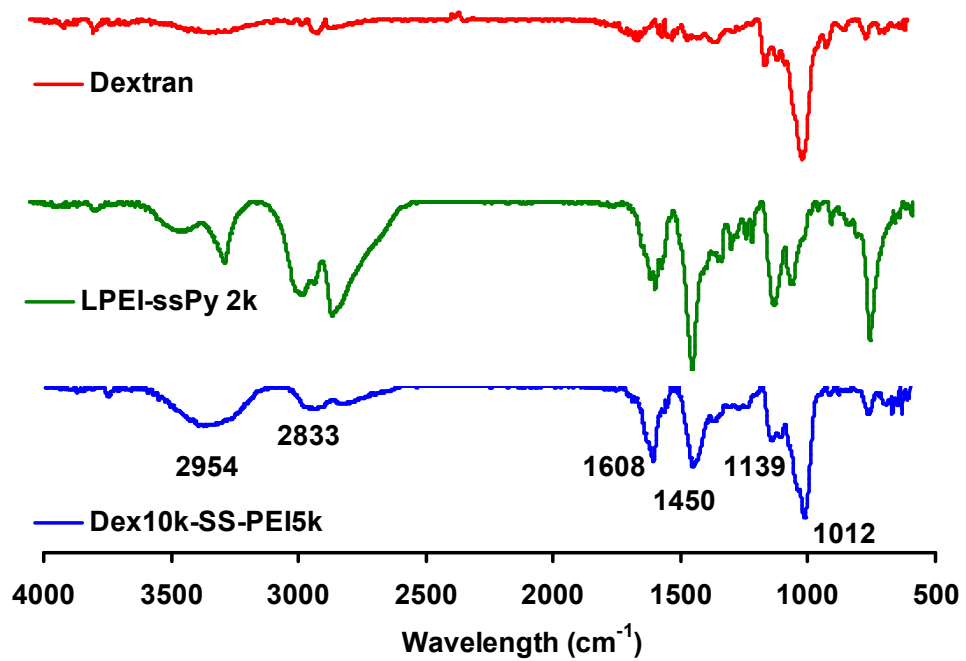

**Figure S2.** FT-IR spectrum of dextran, 2kDa PEI disulfide pyridine and Dex10k-SS-PEI5k.
